# Supplementary material for: Production of the medaka derived from vitrified whole testes by germ cell transplantation
Source: PubMed Central journal article supplement (PMC5335710; doi:10.1038/srep43185), 2017-03-03
Supplement: srep43185-s1.pdf [file srep43185-s1.pdf]

## Title page

### The full manuscript title:

**Production of the medaka derived from vitrified whole testes by germ cell transplantation**

**Author:** Shinsuke Seki<sup>1,2</sup>, Kazunari Kusano<sup>2</sup>, Seungki Lee<sup>2</sup>, Yoshiko Iwasaki<sup>2</sup>, Masaru Yagisawa<sup>2</sup>, Mariko Ishida<sup>2</sup>, Tadashi Hiratsuka<sup>2</sup>, Takao Sasado<sup>3</sup>, Kiyoshi Naruse<sup>3</sup>, Goro Yoshizaki<sup>2</sup>.

<sup>1</sup> Bioscience Education and Research Support Center, Akita University, 1-1-1 Hondo, Akita, Akita 010-8543, Japan

<sup>2</sup> Department of Marine Bioscience, Tokyo University of Marine Science and Technology, 4-5-7 Konan, Minato-ku, Tokyo 108-8477, Japan

<sup>3</sup> Laboratory of Bioresources, National Institute for Basic Biology, 38 Saigo-naka, Myodaiji-cho, Okazaki, Aichi 444-8585, Japan

### The full author list:

#### 1. (Correspondence author)

First / last name: Shinsuke Seki

Affiliation: Bioscience Education and Research Support Center, Akita University, 1-1-1 Hondo, Akita, Akita 010-8543, Japan.

E-mail address: [sseki@gipc.akita-u.ac.jp](mailto:sseki@gipc.akita-u.ac.jp)

Phone number: +81-18-884-6195

#### 2. First / last name: Kazunari Kusano

Affiliation: Department of Marine Bioscience, Tokyo University of Marine Science and Technology, 4-5-7 Konan, Minato-ku, Tokyo 108-8477, Japan

E-mail address: [reuben.k4649@gmail.com](mailto:reuben.k4649@gmail.com)

3. First / last name: Seungki Lee

Affiliation: Department of Marine Bioscience, Tokyo University of Marine Science and Technology, 4-5-7 Konan, Minato-ku, Tokyo 108-8477, Japan

E-mail address: [skmetany@gmail.com](mailto:skmetany@gmail.com)

4. First / last name: Yoshiko Iwasaki

Affiliation: Department of Marine Bioscience, Tokyo University of Marine Science and Technology, 4-5-7 Konan, Minato-ku, Tokyo 108-8477, Japan

E-mail address: [yoshiko0107@hotmail.com](mailto:yoshiko0107@hotmail.com)

5. First / last name: Masaru Yagisawa

Affiliation: Department of Marine Bioscience, Tokyo University of Marine Science and Technology, 4-5-7 Konan, Minato-ku, Tokyo 108-8477, Japan

E-mail address: [masaru.meets.snow@gmail.com](mailto:masaru.meets.snow@gmail.com)

6. First / last name: Mariko Ishida

Affiliation: Department of Marine Bioscience, Tokyo University of Marine Science and Technology, 4-5-7 Konan, Minato-ku, Tokyo 108-8477, Japan

E-mail address: [blackrose.jyorokua@spice.ocn.ne.jp](mailto:blackrose.jyorokua@spice.ocn.ne.jp)

7. First / last name: Tadashi Hiratsuka

Affiliation: Department of Marine Bioscience, Tokyo University of Marine Science and Technology, 4-5-7 Konan, Minato-ku, Tokyo 108-8477, Japan

E-mail address: [tanago\\_th\\_1018@yahoo.co.jp](mailto:tanago_th_1018@yahoo.co.jp)

8. First / last name: Takao Sasado

Affiliation: Laboratory of Bioresources, National Institute for Basic Biology, 38 Saigo-naka, Myodaiji-cho, Okazaki, Aichi 444-8585, Japan

E-mail address: [tsasado@gmail.com](mailto:tsasado@gmail.com)

**9.** First / last name: Kiyoshi Naruse

Affiliation: Laboratory of Bioresources, National Institute for Basic Biology, 38  
Saigo-naka, Myodaiji-cho, Okazaki, Aichi 444-8585, Japan

E-mail address: [naruse@nibb.ac.jp](mailto:naruse@nibb.ac.jp)

**10.** First / last name: Goro Yoshizaki

Affiliation: Department of Marine Bioscience, Tokyo University of Marine Science and  
Tenchology, 4-5-7 Konan, Minato-ku, Tokyo 108-8477, Japan

E-mail address: [ymiura0@kaiyodai.ac.jp](mailto:ymiura0@kaiyodai.ac.jp)

Correspondence and requests for materials should be addressed to Shinsuke Seki (email:  
[sseki@gipc.akita-u.ac.jp](mailto:sseki@gipc.akita-u.ac.jp))

## **Supplementary Online Material**

Tables S1 and S2

Supplementary Table S1

Efficiency of making triploid recipients and spermatogonia transplantation of donor-derived offspring in each experimental group

| Donor<br><i>olvas-GFP</i> , orange |                            | Recipient<br>WT, black | No. of<br>recipient | No. of<br>recipient<br>survived | No. of<br>Triploid<br>recipient | GT of<br>Triploid<br>recipient |
|------------------------------------|----------------------------|------------------------|---------------------|---------------------------------|---------------------------------|--------------------------------|
| Group                              | Vitrification<br>of testis | Heat<br>shock          |                     |                                 |                                 |                                |
| 1                                  | No                         | Yes                    | 10                  | 6/10 (60.0%)                    | 5/6 (83.3%)                     | 5/5 (100.0%)                   |
| 2                                  | No                         | Yes                    | 54                  | 30/54 (55.6%)                   | 13/30 (43.3%)                   | 8/13 (61.5%)                   |
| 3                                  | No                         | Yes                    | 41                  | 24/41 (58.5%)                   | 16/24 (66.7%)                   | 13/16 (81.3%)                  |
| 4                                  | No                         | Yes                    | 36                  | 24/36 (66.7%)                   | 12/24 (50.0%)                   | 9/12 (75.0%)                   |
| 5                                  | Yes                        | Yes                    | 20                  | 13/20 (65.0%)                   | 8/13 (61.5%)                    | 7/8 (87.5%)                    |
| 6                                  | Yes                        | Yes                    | 44                  | 29/44 (65.9%)                   | 16/29 (55.2%)                   | 11/16 (68.8%)                  |
| 7                                  | Yes                        | Yes                    | 47                  | 24/47 (51.1%)                   | 13/24 (54.2%)                   | 10/13 (76.9%)                  |
| 8                                  | Yes                        | Yes                    | 50                  | 29/50 (58.0%)                   | 14/29 (48.3%)                   | 10/29 (71.4%)                  |

## Supplementary Table S2

Efficiency of making triploid recipients and spermatogonia transplantation and appearance rate of donor-derived offspring among F1 generation

| Donor                                                  |            |                         | Recipient                   |            |            | N | No. of recipient survived | No. of Triploid recipient | GT of Triploid recipient | Phenotype of F1 |                   |
|--------------------------------------------------------|------------|-------------------------|-----------------------------|------------|------------|---|---------------------------|---------------------------|--------------------------|-----------------|-------------------|
| Group                                                  | Body color | Vitrification of testis | Group                       | Body color | Heat shock |   |                           |                           |                          | Donor-derived   | Recipient-derived |
| -                                                      | -          | -                       | Wild type                   | Black      | No         | 5 | 26/97<br>(36.6 ± 16.0%)   | -                         | -                        | -               | -                 |
| -                                                      | -          | -                       | Wild type                   | Black      | Yes        | 8 | 51/152<br>(35.7 ± 15.9%)  | 28/51<br>(56.8 ± 29.4%)   | -                        | -               | -                 |
| -                                                      | -          | -                       | <i>olvas-GFP</i> transgenic | Orange     | Yes        | 5 | 55/165<br>(38.5 ± 30.6%)  | 40/50<br>(75.4 ± 14.9%)   | -                        | -               | -                 |
| <i>olvas-GFP</i> transgenic                            | Orange     | No                      | Wild type                   | Black      | Yes        | 4 | 86/166<br>(49.8 ± 10.6%)  | 47/86<br>(58.7 ± 7.3%)    | 35/47<br>(63.6 ± 17.1%)  | -               | -                 |
| <i>olvas-GFP</i> transgenic                            | Orange     | Yes                     | Wild type                   | Black      | Yes        | 4 | 115/192<br>(60.9 ± 2.8%)  | 62/115<br>(54.8 ± 2.1%)   | 43/62<br>(70.0 ± 6.9%)   | 1169<br>(100%)  | 0 (0%)            |
| Inbred line (Kaga)                                     | Black      | Yes                     | <i>olvas-GFP</i> transgenic | Orange     | Yes        | 2 | 46/100<br>(45.7 ± 3.4%)   | 35/46<br>(77.3 ± 6.9%)    | 20/35<br>(58.6 ± 23.3%)  | 50<br>(100%)    | 0 (0%)            |
| Endangered wild population (Tokyo medaka)              | Black      | Yes                     | <i>olvas-GFP</i> transgenic | Orange     | Yes        | 3 | 28/148<br>(20.0 ± 6.2%)   | 9/20<br>(37.8 ± 21.1%)    | 6/9<br>(63.9 ± 12.7%)    | 50<br>(100%)    | 0 (0%)            |
| Line has low fertility ( <i>wnt4b</i> <sup>-/-</sup> ) | Orange     | Yes                     | Wild type                   | Black      | Yes        | 3 | 41/155<br>(29.2 ± 1.7%)   | 25/41<br>(61.4 ± 3.4%)    | 21/25<br>(83.3 ± 11.0%)  | 259<br>(100%)   | 0 (0%)            |
